# Supplementary material for: Mutation S115T in IMP-Type Metallo-β-Lactamases Compensates for Decreased Expression Levels Caused by Mutation S119G
Source: PubMed Central journal article supplement (PMC6920813; doi:10.3390/biom9110724), 2019-11-11
Supplement: biomolecules-09-00724-s001.pdf [file biomolecules-09-00724-s001.pdf]

**Supplementary Materials**

**Table S1.** Agar disc diffusion assay inhibition zone diameters  
Means  $\pm$  standard deviations are given for 4 replicates.

| $\beta$ -Lactam | Zone Diameter (mm)                      |                                               |                                               |                                                     |            | Empty<br>pBCSK(+) |
|-----------------|-----------------------------------------|-----------------------------------------------|-----------------------------------------------|-----------------------------------------------------|------------|-------------------|
|                 | pBCSK(+)<br><i>bla</i> <sub>IMP-1</sub> | pBCSK(+)<br><i>bla</i> <sub>IMP-1-S115T</sub> | pBCSK(+)<br><i>bla</i> <sub>IMP-1-S119G</sub> | pBCSK(+)<br><i>bla</i> <sub>IMP-1-S115T-S119G</sub> | No vector  |                   |
| Ampicillin      | 0 $\pm$ 0                               | 0 $\pm$ 0                                     | 0 $\pm$ 0                                     | 0 $\pm$ 0                                           | 25 $\pm$ 1 | 30 $\pm$ 1        |
| Ceftazidime     | 0 $\pm$ 0                               | 0 $\pm$ 0                                     | 0 $\pm$ 0                                     | 0 $\pm$ 0                                           | 38 $\pm$ 1 | 43 $\pm$ 3        |
| Imipenem        | 25 $\pm$ 1                              | 25 $\pm$ 1                                    | 25 $\pm$ 1                                    | 24 $\pm$ 1                                          | 33 $\pm$ 2 | 38 $\pm$ 2        |
| Meropenem       | 24 $\pm$ 1                              | 25 $\pm$ 1                                    | 24 $\pm$ 1                                    | 23 $\pm$ 1                                          | 39 $\pm$ 1 | 45 $\pm$ 3        |

**Table S2.** Enzyme kinetic constants  
Means  $\pm$  standard deviations of three measurements are reported.

|            | IMP-1                     |                      |                                         | IMP-1-S115T               |                      |                                         | IMP-1-S119G               |                      |                                         | IMP-1-S115T-S119G         |                      |                                         |
|------------|---------------------------|----------------------|-----------------------------------------|---------------------------|----------------------|-----------------------------------------|---------------------------|----------------------|-----------------------------------------|---------------------------|----------------------|-----------------------------------------|
|            | $k_{cat}$<br>( $s^{-1}$ ) | $K_m$<br>( $\mu M$ ) | $k_{cat}/K_m$<br>( $\mu M^{-1}s^{-1}$ ) | $k_{cat}$<br>( $s^{-1}$ ) | $K_m$<br>( $\mu M$ ) | $k_{cat}/K_m$<br>( $\mu M^{-1}s^{-1}$ ) | $k_{cat}$<br>( $s^{-1}$ ) | $K_m$<br>( $\mu M$ ) | $k_{cat}/K_m$<br>( $\mu M^{-1}s^{-1}$ ) | $k_{cat}$<br>( $s^{-1}$ ) | $K_m$<br>( $\mu M$ ) | $k_{cat}/K_m$<br>( $\mu M^{-1}s^{-1}$ ) |
| <b>PEN</b> | 2000 $\pm$ 100            | 420 $\pm$ 40         | 4.7 $\pm$ 0.1                           | 740 $\pm$ 50              | 600 $\pm$ 50         | 1.2 $\pm$ 0.1                           | 900 $\pm$ 40              | 270 $\pm$ 20         | 3.4 $\pm$ 0.1                           | 550 $\pm$ 10              | 230 $\pm$ 10         | 2.3 $\pm$ 0.1                           |
| <b>AMP</b> | 260 $\pm$ 20              | 340 $\pm$ 50         | 0.77 $\pm$ 0.07                         | 140 $\pm$ 10              | 270 $\pm$ 30         | 0.5 $\pm$ 0.2                           | 300 $\pm$ 40              | 290 $\pm$ 60         | 1.0 $\pm$ 0.1                           | 113 $\pm$ 3               | 190 $\pm$ 10         | 0.59 $\pm$ 0.02                         |
| <b>CEF</b> | 122 $\pm$ 1               | 2.1 $\pm$ 0.1        | 57 $\pm$ 1                              | 64 $\pm$ 1                | 2.5 $\pm$ 0.1        | 26 $\pm$ 1                              | 48 $\pm$ 1                | 1.9 $\pm$ 0.1        | 25 $\pm$ 1                              | 22 $\pm$ 1                | 1.7 $\pm$ 0.1        | 13 $\pm$ 1                              |
| <b>FOX</b> | 21 $\pm$ 1                | 1.2 $\pm$ 0.1        | 17 $\pm$ 1                              | 13 $\pm$ 1                | 1.6 $\pm$ 0.1        | 8.1 $\pm$ 0.1                           | 12 $\pm$ 1                | 1.3 $\pm$ 0.1        | 9.6 $\pm$ 0.6                           | 10 $\pm$ 1                | 1.1 $\pm$ 0.1        | 9.5 $\pm$ 0.2                           |
| <b>CTX</b> | 21 $\pm$ 2                | 1.5 $\pm$ 0.1        | 13 $\pm$ 1                              | 19 $\pm$ 1                | 2.6 $\pm$ 0.1        | 7.3 $\pm$ 0.3                           | 32 $\pm$ 1                | 4.7 $\pm$ 0.3        | 6.9 $\pm$ 0.3                           | 23 $\pm$ 1                | 0.99 $\pm$ 0.06      | 23 $\pm$ 1                              |
| <b>CAZ</b> | 18 $\pm$ 1                | 50 $\pm$ 6           | 0.35 $\pm$ 0.02                         | 14 $\pm$ 1                | 43 $\pm$ 2           | 0.32 $\pm$ 0.01                         | 15.4 $\pm$ 0.2            | 35 $\pm$ 1           | 0.45 $\pm$ 0.01                         | 25 $\pm$ 2                | 51 $\pm$ 6           | 0.50 $\pm$ 0.03                         |
| <b>IPM</b> | 200 $\pm$ 10              | 33 $\pm$ 1           | 6.1 $\pm$ 0.1                           | 153 $\pm$ 3               | 29 $\pm$ 1           | 5.2 $\pm$ 0.1                           | 180 $\pm$ 3               | 12 $\pm$ 1           | 15 $\pm$ 1                              | 110 $\pm$ 13              | 28 $\pm$ 5           | 4.0 $\pm$ 0.3                           |
| <b>MEM</b> | 26 $\pm$ 1                | 7.5 $\pm$ 0.6        | 3.6 $\pm$ 0.2                           | 14 $\pm$ 1                | 5.8 $\pm$ 0.6        | 2.3 $\pm$ 0.1                           | 54 $\pm$ 1                | 10 $\pm$ 1           | 5.4 $\pm$ 0.1                           | 22 $\pm$ 1                | 3.0 $\pm$ 0.2        | 7.5 $\pm$ 0.4                           |
| <b>DOR</b> | 180 $\pm$ 20              | 12.8 $\pm$ 0.6       | 14 $\pm$ 1                              | 113 $\pm$ 7               | 18 $\pm$ 2           | 6.3 $\pm$ 0.3                           | 350 $\pm$ 20              | 29 $\pm$ 1           | 12.1 $\pm$ 0.4                          | 250 $\pm$ 40              | 29 $\pm$ 8           | 9 $\pm$ 1                               |
| <b>ATM</b> | ND                        |                      |                                         | ND                        |                      |                                         | ND                        |                      |                                         | ND                        |                      |                                         |
